# Supplementary material for: Evaluation of KRASG12C inhibitor responses in novel murine KRASG12C lung cancer cell line models
Source: PubMed Central journal article supplement (PMC9945252; doi:10.3389/fonc.2023.1094123), 2023-02-08
Supplement: DataSheet_1.pdf [file DataSheet_1.pdf]

# **Supplementary Information for Evaluation of KRAS<sup>G12C</sup> Inhibitor Responses in Novel Murine KRAS<sup>G12C</sup> Lung Cancer Cell Line Models**

**Daniel J Sisler<sup>1,3</sup>, Trista K Hinz<sup>1,3</sup>, Anh T Le<sup>2</sup>, Emily K Kleczko<sup>2</sup>, Raphael A Nemenoff<sup>2</sup>, Lynn E Heasley<sup>1,3\*</sup>**

Departments of <sup>1</sup>Craniofacial Biology and <sup>2</sup>Medicine, University of Colorado Anschutz Medical Campus, Aurora, CO

<sup>3</sup>Eastern Colorado VA Healthcare System, Rocky Mountain Regional VA Medical Center, Aurora, CO

## **\*Corresponding Author:**

Lynn E. Heasley  
Department of Craniofacial Biology  
University of Colorado Anschutz Medical Campus  
Aurora, Colorado  
(303) 724-4578  
[Lynn.heasley@cuanschutz.edu](mailto:Lynn.heasley@cuanschutz.edu)

**Running Title:** Novel murine KRAS<sup>G12C</sup>-dependent lung cancer cell lines

**Supplemental Figures S1 – S8  
Supplemental Table S1 and S2**

**A.**

| Chr  | Genomic Frame | Gene | Mutation Function | Amino Acid Change     | cytoBand |
|------|---------------|------|-------------------|-----------------------|----------|
| chr3 | exonic        | Nras | nonsynonymous SNV | Nras:NM_010937:p.Q61H | 3qF2.2   |

**B.**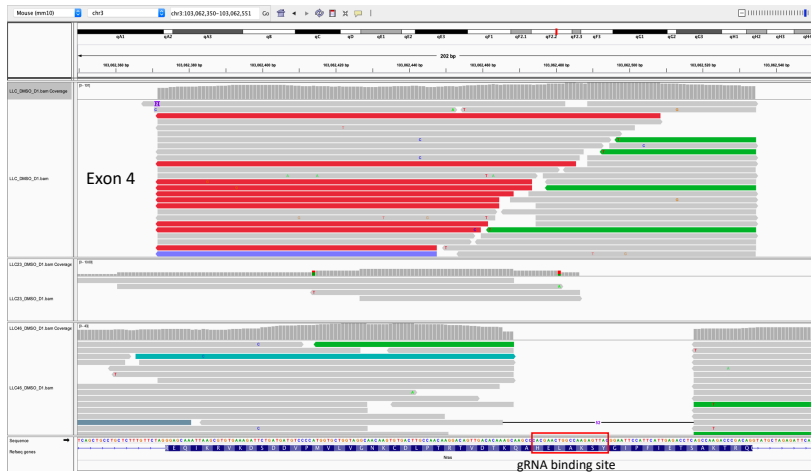**C.**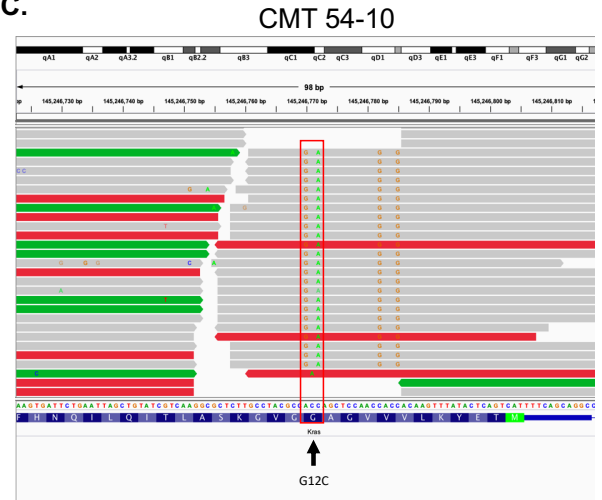

**Supplemental Figure S1. Validation of NRAS Q61H mutation and CRISPR/Cas9 genomic editing. (A)** Variant call analysis (See Materials and Methods) was performed on parental LLC RNA sequencing data. **(B)** Integrated genomic viewer (IGV) analysis of NRAS exon 5 in parental LLCs compared to 2 LLC NRAS KO subclones (LLC 23 and LLC 46). **(C)** IGV analysis of CMT KRAS G12C subclone 54-10 RNA sequencing data focused on KRAS exon 2, codon 12.

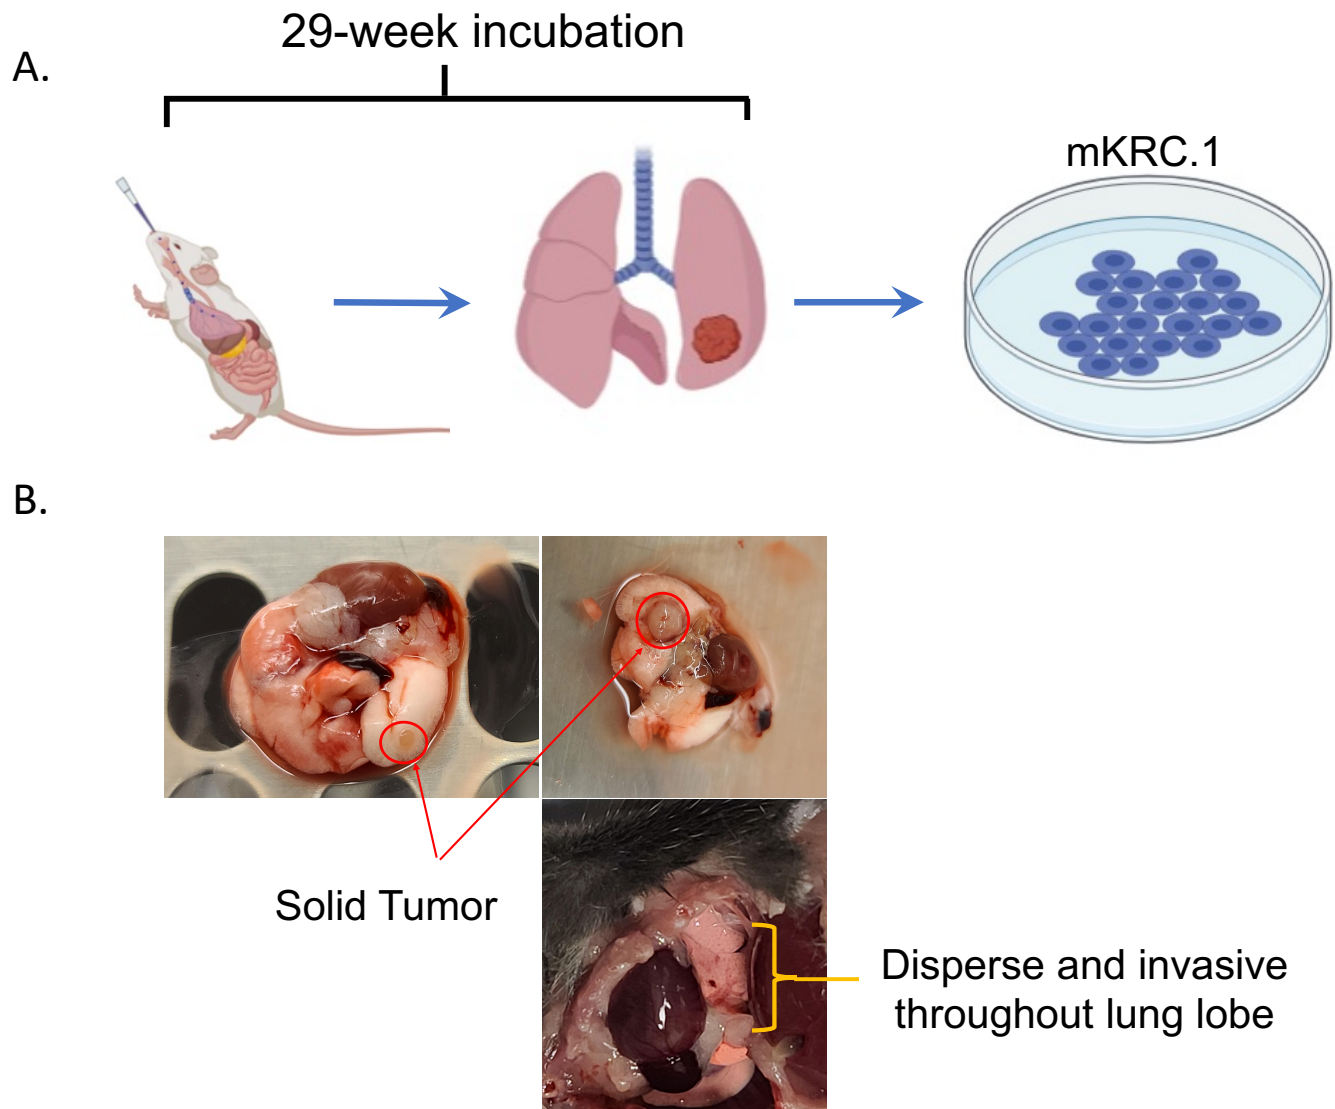

**Supplemental Figure S2. Overview of development of mKRC.1 cell line.** (A) Schematic of intratracheal injections followed by lung resection and cell line development. (B) Gross images showing lung tumor nodules and patterns of tumor development within mouse lungs.

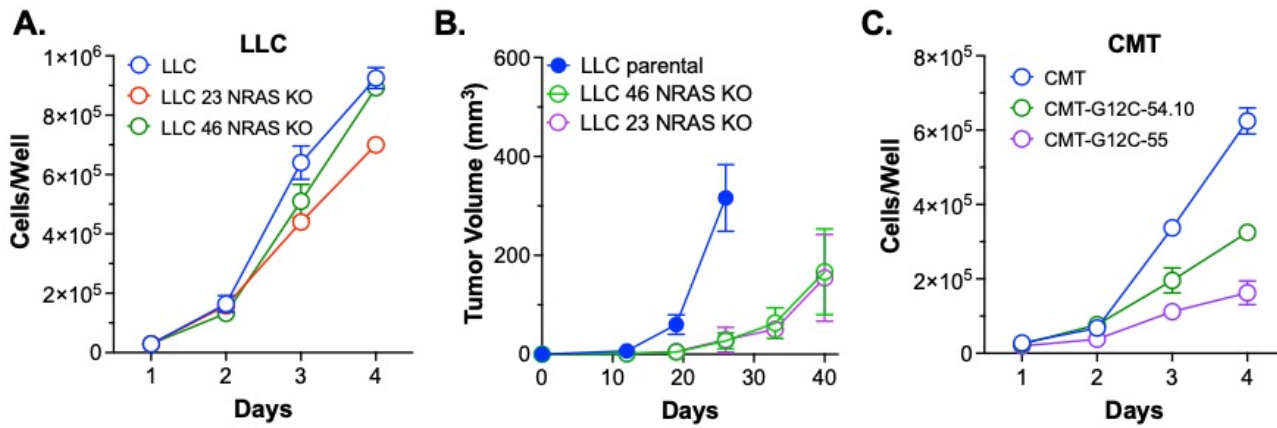

**Supplementary Figure S3**

**Supplementary Figure S3. Baseline growth rates of LLC and CMT167 CRISPR-edited cell lines *in vitro* and *in vivo*.** (A) and (C) Parental and CRISPR-edited cell lines were plated at 25,000 cells per well in 24-well plates and cultured. Duplicate wells were trypsinized and cells counted after 1-4 days. The data are the means and SEM. (B) LLC parental, LLC 23 NRAS KO and LLC 46 NRAS KO cell lines were orthotopically implanted into the left lungs of C57BL/6 mice and tumor growth was measured via weekly  $\mu$ CT imaging. The data are the means and SEM of 5 mice per cell line.

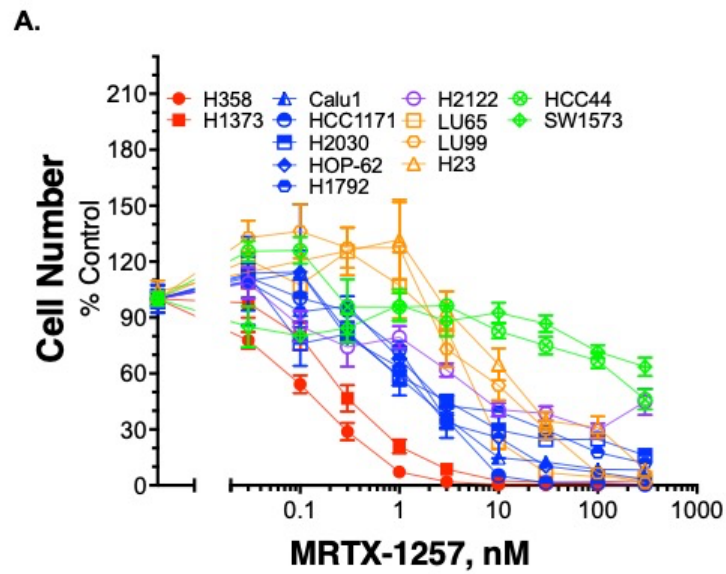

**B.**

Human KRAS-G12C Lung  
Cancer Cell lines

|         | MRTX-1257 IC <sub>50</sub><br>(nM) | AMG-510 IC <sub>50</sub><br>(nM) |
|---------|------------------------------------|----------------------------------|
| H358    | 0.11                               | 0.27                             |
| H1373   | 0.30                               | 3.80                             |
| Calu1   | 1.62                               | 2.47                             |
| HCC1171 | 1.96                               | 7.38                             |
| H2030   | 2.69                               | 16.98                            |
| HOP-62  | 1.85                               | 14.7                             |
| LU65    | 6.90                               | 1.96                             |
| H1792   | 3.87                               | 187.2                            |
| H2122   | 7.96                               | 64.8                             |
| H23     | 23.0                               | 92.54                            |
| LU99    | 12.25                              | N/D                              |
| HCC44   | 185.7                              | 1386                             |
| SW1573  | 355.5                              | 2534                             |

**Supplemental Figure S4. Sensitivity of human KRAS-G12C positive lung cancer cell lines to MRTX-1257 and AMG-510.** A panel of thirteen human KRAS-G12C mutant lung cancer cell lines were seeded at 100-200 cells/well in 96-well plates and treated for 7-10 days with MRTX-1257 (A) or AMG-510 (not shown). Cell number was assayed with CyQUANT reagent. The data are the means and SEM of triplicate measurements presented as percent of the DMSO control treatments. (B) Prism 9 was used to calculate the IC<sub>50</sub> values from the MRTX-1257 and AMG-510 dose-response curves.

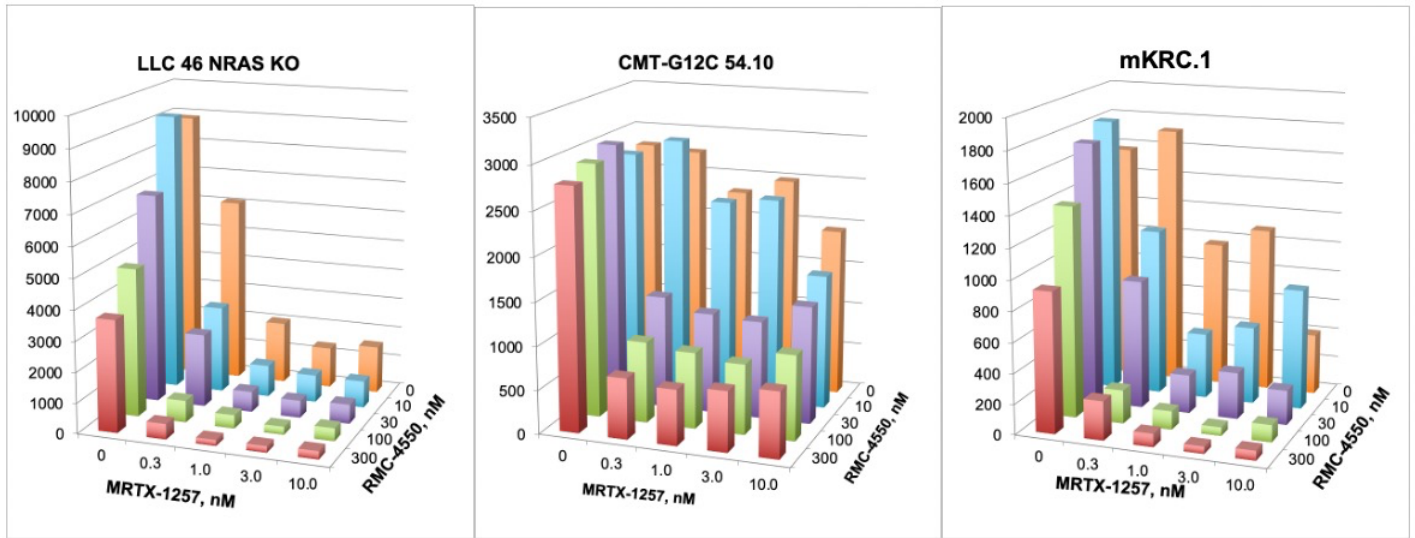

**Supplemental Figure S5**

**Supplemental Figure S5. Primary MRTX-1257-RMC-4550 combination data used for calculating drug synergy.** The indicated murine KRAS-G12C cell lines were treated with combinations of MRTX-1257 and RMC-4550 at the concentrations shown in quadruplicate in a 96-well format. After 7-10 days of treatment, cell number was measured with CyQUANT reagent and the average values among the replicates is plotted as shown.

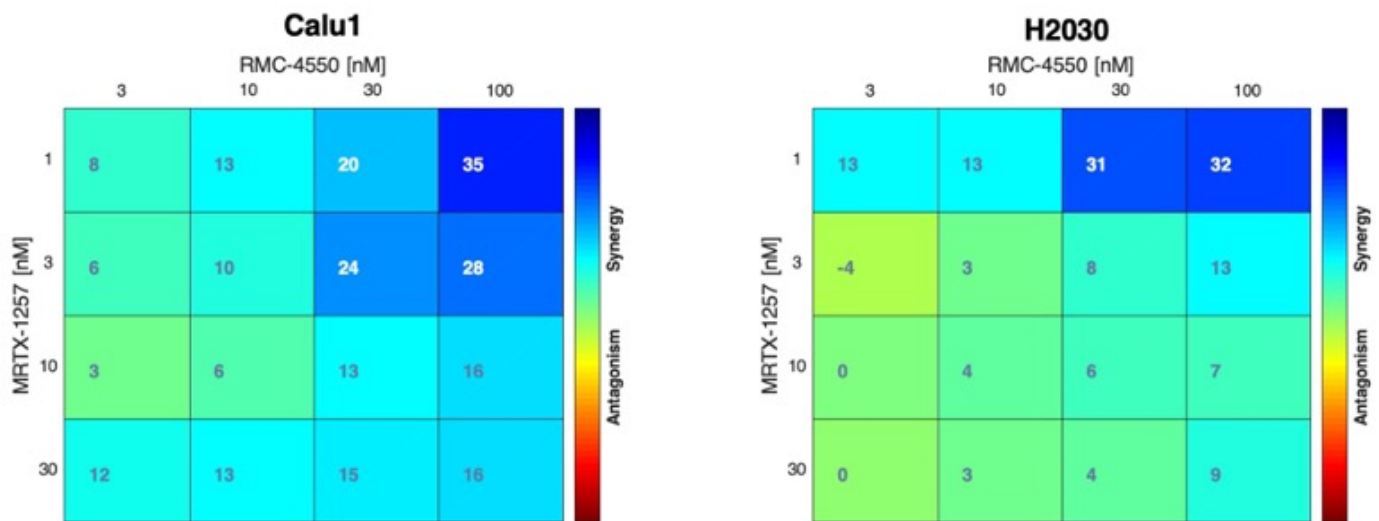

**Supplemental Figure S6. Analysis of KRAS<sup>G12C</sup>-SHP2 inhibitor synergy in human KRAS<sup>G12C</sup> lung cancer cell lines.** Calu1 and H2030 were seeded at 100 cells/well in 96-well plates and treated in duplicate with the indicated concentrations of MRTX-1257 and RMC-4550 for 7-10 days. Cell numbers were assayed with CyQUANT reagent and the resulting data were analyzed with Combenefit for drug synergy using the HSA model.

LLC 46 NRAS KO *In vivo* study

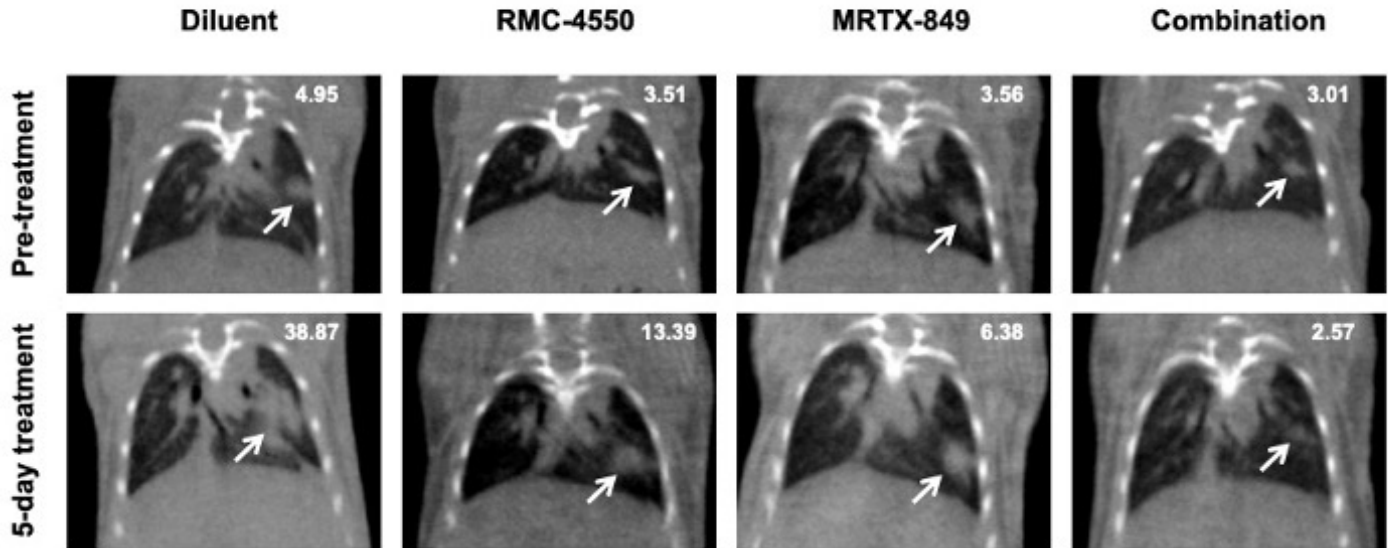

**Supplemental Figure S7**

**Supplemental Figure S7. MicroCT images from representative orthotopic LLC 46 NRAS KO lung tumors.** Representative orthotopic lung tumors from the LLC 46 NRAS KO experiment in Figure 3 are shown from the four experimental groups before and after 5 days of daily treatment. The values in the upper right-hand corner of each image are the tumor volumes calculated by the ITK-SNAP software program.



mKRC.1 *In vivo* study

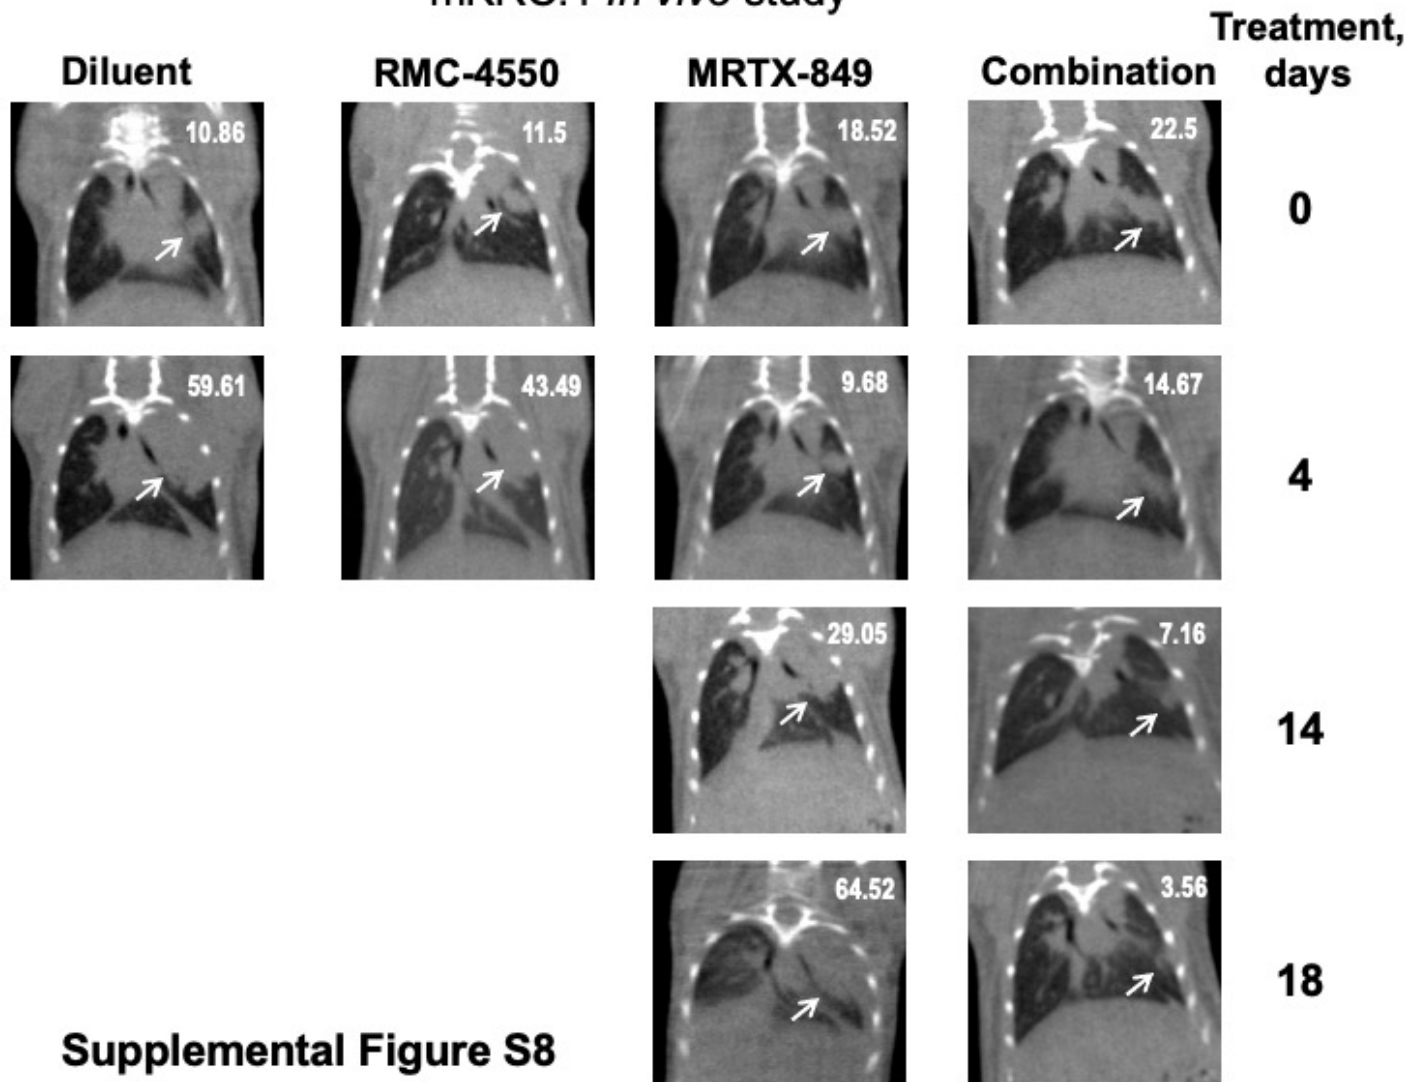

**Supplemental Figure S8**

**Supplemental Figure S8. MicroCT images from representative orthotopic mKRC.1 lung tumors.** Representative orthotopic lung tumors from the mKRC.1 experiment in Figure 4 are shown from the four experimental groups prior to and after the indicated number of days of daily treatment. The values in the upper right-hand corner of each image are the tumor volumes calculated by the ITK-SNAP software program.

**Supplementary Table S1. Insertion and deletion mutations detected by variant calling of RNAseq data from CRISPR/Cas9-edited murine KRAS cell lines.** Three independent samples from the indicated KRAS-G12C clones as well as parental CMT167 and LLC cells were submitted to RNAseq followed by variant calling as described in the Materials and Methods. Insertion and deletion mutations identified in at least two of the replicate samples and not found to be present in any of the parental cell line replicates are tabulated below.

| CMT KRAS-G12C.54.10       | CMT KRAS-G12C.55        | LLC NRAS-KO.23       | LLC NRAS KO.46         |
|---------------------------|-------------------------|----------------------|------------------------|
| Afg3l2:p.K787delinsKKE    | 9030624J02Rik:p.H704fs  | Cherp:p.812_814del   | 0610010F05Rik:p.V622fs |
| Brms1:p.E179fs            | Afg3l2:p.K787delinsKKE  | Gm7244:p.61_61del    | 1600014C10Rik:p.P82fs  |
| Cwc22:p.R77fs             | Amotl1:p.N561fs         | Kdm3b:p.E236fs       | Anapc2:p.17_19del      |
| D6Ert527e:p.S374delinsSSS | Atrx:p.V2020fs          | Plekhm2:p.508_509del | Apbb1ip:p.149_149del   |
| Dbf4:p.V134fs             | B2m:p.T24fs             | Pusl1:p.E158fs       | Atrx:p.V2020fs         |
| Efcab5:p.Q372fs           | Chd1l:p.V624fs          | Sgta:p.L247fs        | Epha2:p.R891fs         |
| Hgfac:p.N544fs            | Dbf4:p.V134fs           | Stk11:p.M125fs       | Gm7244:p.61_61del      |
| Hnf1b:p.151_154del        | Ddx58:p.I460fs          | Tpm1:p.K177fs        | Il1r1:p.F280fs         |
| Kif12:p.S59delinsSPPGGG   | Dynlt3:p.E24fs          |                      | Ltbp1:p.Q241fs         |
| Lrba:p.1152_1161del       | Eif4g3:p.L983fs         |                      | Mink1:p.487_488del     |
| Ltbp3:p.P285fs            | Hnf1b:p.151_154del      |                      | Nr3c1:p.74_75del       |
| Mars:p.V259fs             | Kif12:p.S59delinsSPPGGG |                      | Pex6:p.K49fs           |
| Megf8:p.N2158fs           | Lamb3:p.D100fs,         |                      | Plekhm2:p.508_509del   |
| Muc4:p.L1347fs            | Lig1:p.L689fs           |                      | Ppp4c:p.V68fs          |
| Myo6:p.E461fs             | Lrba:p.1152_1161del     |                      | Prmt1:p.H119fs         |
| Myo9a:p.L2104delinsLL     | Msln:p.G30fs            |                      | Ptgr2:p.M52fs          |
| Naa16:p.K625fs            | Muc4:Np.L1347fs         |                      | Pusl1:p.E158fs         |
| Psap:p.Q260fs             | Muc4:p.V1684delinsVV    |                      | Rnd3:p.N51fs           |
| Rabggta:p.K80fs           | Numb:p.T68fs            |                      | Rnf10:p.Y623fs         |
| Scnn1a:p.S508fs           | Nup153:p.T407fs         |                      | Sec24b:p.237_237del    |
| Slc9a5:p.A698fs           | Pdlim1:p.P176fs         |                      | Tpm1:p.K177fs          |
| Ssfa2p.S166fs             | Phkb:p.R619fs           |                      | Unc119:p.I204delinsII  |
| Uchl4:p.100_102del        | Plxnd1:p.A715fs         |                      | Whsc1l1:p.147_147del   |
| Zfp553:p.L401fs           | Pold3:p.A219fs          |                      |                        |
| Zmat3:p.Q90fs             | Ppp2r5c:p.I32fs         |                      |                        |
|                           | Prmt9:p.S192delinsSI    |                      |                        |
|                           | Psap:p.Q260fs           |                      |                        |
|                           | Smek2:p.I263fs          |                      |                        |
|                           | Ssfa2:p.S166fs          |                      |                        |
|                           | Trerf1:p.T1090fs        |                      |                        |
|                           | Trim41:p.124_126del     |                      |                        |
|                           | Uchl4:p.100_102del      |                      |                        |
|                           | Usp16:p.Q392fs          |                      |                        |
|                           | Wsb2:p.G351fs           |                      |                        |
|                           | Zfp36l1:p.K19fs         |                      |                        |
|                           | Zfp553:p.L401fs         |                      |                        |

**Supplementary Table S2. KRAS-G12C inhibitor IC50 values from dose-response experiments in murine cell lines (Figure 1).** Dose-response data were submitted to non-linear fitting using the "log(inhibitor) vs. normalized response" feature in Prism 9. The calculated IC50 values and the 95% confidence intervals (CI) are tabulated. ND, not determined.

| Cell Line      | AMG-510  |               | MRTX-1257 |              | MRTX-849 |            | Trametinib |              |
|----------------|----------|---------------|-----------|--------------|----------|------------|------------|--------------|
|                | IC50     | 95% CI        | IC50      | 95% CI       | IC50     | 95% CI     | IC50       | 95% CI       |
| LLC Parental   | 236      | 118 to 530    | 246       | 82 to 1035   | ND       | ND         | 26         | 11 to 63     |
| LLC 46 NRAS KO | 16.9     | 10.9 to 26.2  | 1.6       | 1.0 to 2.3   | 44       | 30 to 64   | 21         | 8.0 to 59    |
| LLC 23 NRAS KO | 7.4      | 5.0 to 10.8   | 2.7       | 2.0 to 3.7   | ND       | ND         | 9.6        | 5.6 to 16    |
| CMT Parental   | Unstable |               | Unstable  |              | ND       | ND         | 2          | 1.2 to 3.4   |
| CMT54.10       | 7.9      | 5.7 to 11     | 1.2       | 0.79 to 1.9  | 64       | 30 to 139  | 0.59       | 0.44 to 0.78 |
| CMT55          | 5.1      | 2.9 to 8.8    | 0.33      | 0.14 to 0.77 | ND       | ND         | 0.52       | 0.25 to 1.1  |
| mKRC.1         | 218.2    | 99.5 to 565.1 | 3.1       | 2.3 to 4.1   | 5.5      | 3.6 to 8.3 | 1.2        | 0.53 to 2.1  |
